# Supplementary material
Source: PubMed Central journal article supplement (PMC3133234)

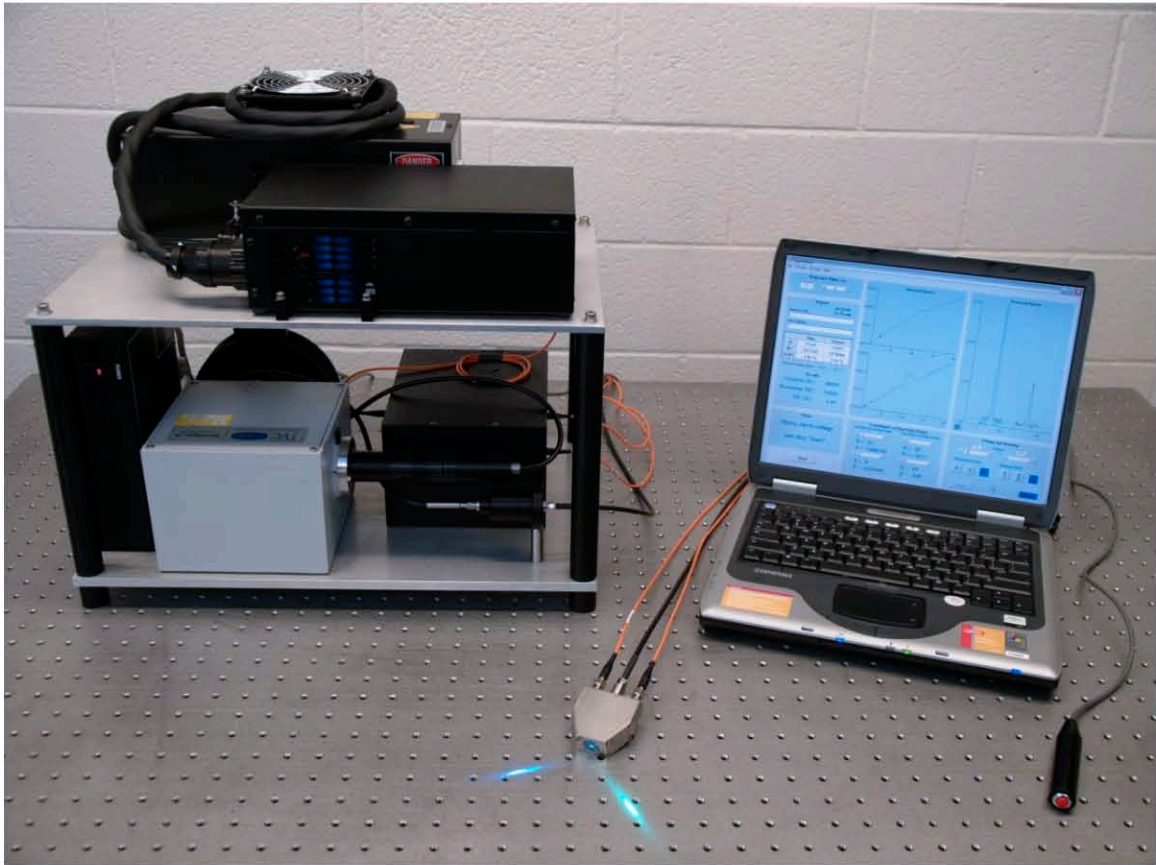

Supplement: supp_2010.29707_AJCN_29707_SF1.pdf [file supp_2010.29707_AJCN_29707_SF1.pdf]
